# Supplementary material for: IL-37/ STAT3/ HIF-1α negative feedback signaling drives gemcitabine resistance in pancreatic cancer
Source: PubMed Central journal article supplement (PMC7086367; doi:10.7150/thno.42416), 2020-03-04
Supplement: thnov10p4088s1.pdf [file thnov10p4088s1.pdf]

## **Supplementary materials**

**Figure S1. Examined IL-37 and  $\alpha$ -SMA expression in PDAC samples by IHC and performed the Masson stain (n=85).**

And the statistical data showed that IL-37 was not associated with  $\alpha$ -SMA expression and stromal fibrosis ( $P > 0.05$ ).

**Figure S2. Measurement the effect of rIL-37 on proliferation of the PDAC cell lines by real-time cell analysis (RTCA) system.**

The data showed that rhIL-37 (100 ng/ml) did not decreased proliferation of the PDAC cell lines (SW1990, PANC-1 and MIA-PaCa2) at 24 h and 36 h ( $P > 0.05$ ). But rhIL-37 can decrease proliferation of the PDAC cell lines at 48 h and more than 48 h ( $P < 0.01$ ). \*\* $P < 0.01$  and \*\*\* $P < 0.01$ .

**Figure S3. Examination the level of p-STAT3 (705) and HIF-1 $\alpha$  in PDAC samples by IHC (n=85).**

The statistical data showed that there was a positive relationship between HIF-1 $\alpha$  and p-STAT3 (705) expression ( $P = 0.023$ ).

**Figure S1**

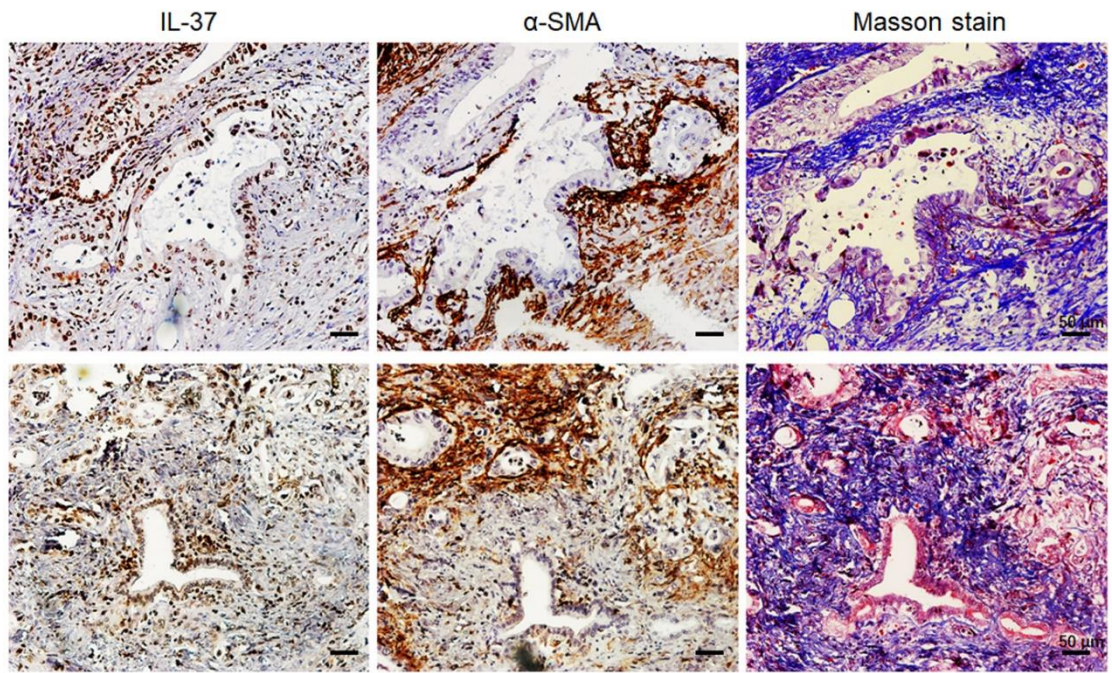

IL-37

|       |       | -/++ | +/+++ | <i>r</i> | <i>P</i> |
|-------|-------|------|-------|----------|----------|
| α-SMA | -/+   | 35   | 8     | 0.035    | 0.748    |
|       | +/+++ | 33   | 9     |          |          |

IL-37

|        |       | -/++ | +/+++ | <i>r</i> | <i>P</i> |
|--------|-------|------|-------|----------|----------|
| Masson | -/+   | 60   | 12    | 0.196    | 0.072    |
|        | +/+++ | 8    | 5     |          |          |

**Figure S2**

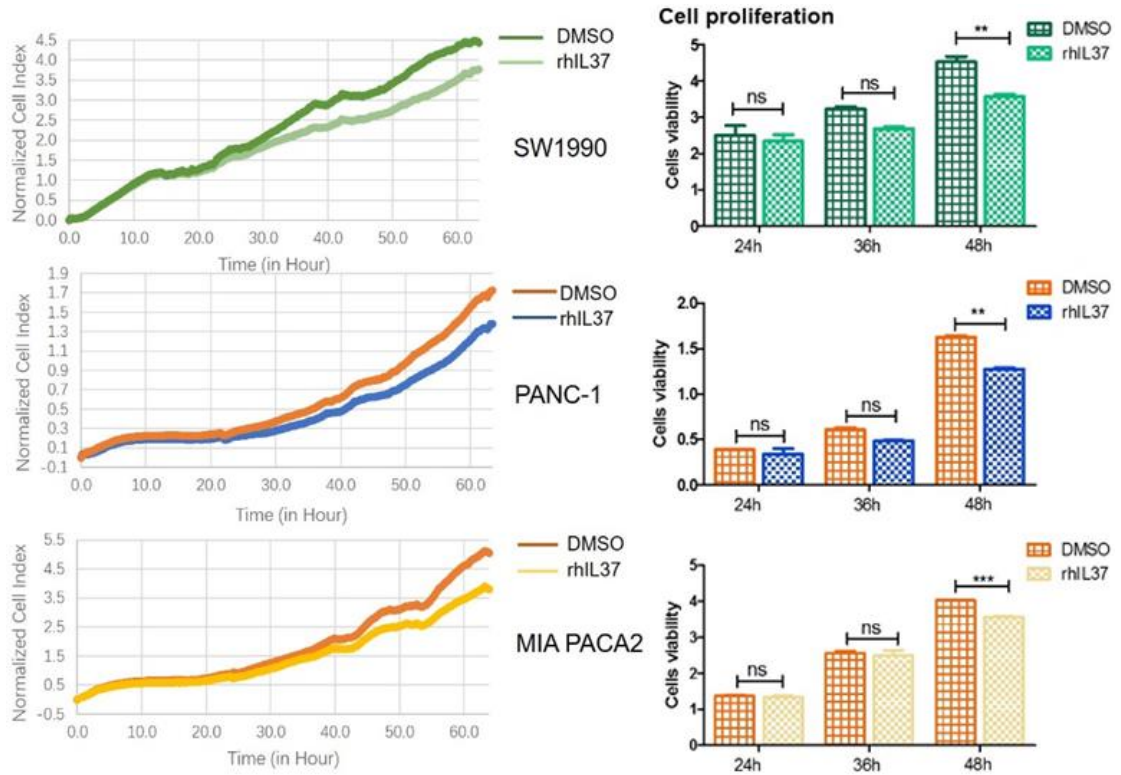

**Figure S3**

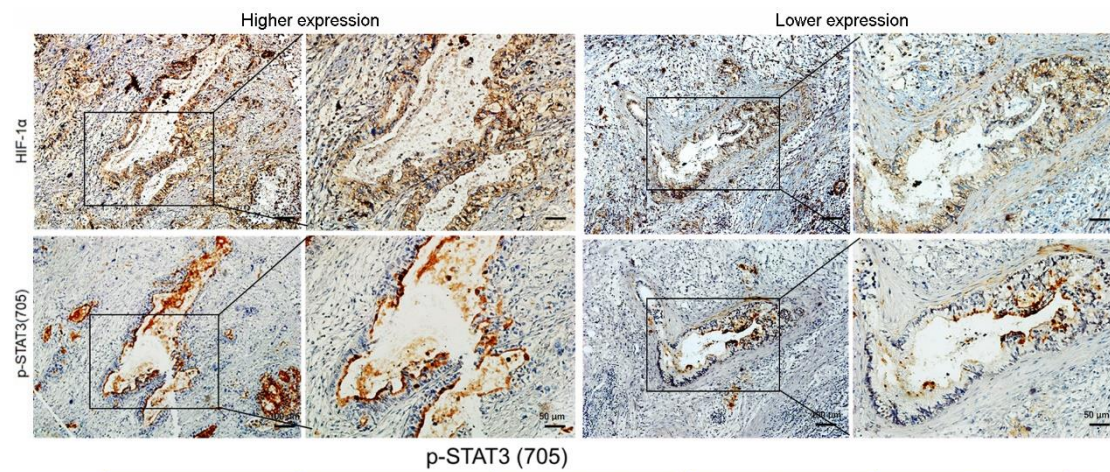

|        |     | p-STAT3 (705) |     | <i>r</i> | <i>P</i> |
|--------|-----|---------------|-----|----------|----------|
|        |     | -/+           | +/+ |          |          |
| HIF-1α | -/+ | 46            | 12  | 0.246    | 0.023    |
|        | +/+ | 15            | 12  |          |          |

**Table S1 Antibodies and primers**

| <b>Antibodies</b>               |                                                  |                          |            |        |
|---------------------------------|--------------------------------------------------|--------------------------|------------|--------|
| Name                            | Manufacturer                                     | Number                   | Type       | Usage  |
| IL-37                           | Abcam                                            | ab153889                 | Monoclonal | IHC    |
| IL-37                           | Abcam                                            | ab 57187                 | Monoclonal | WB, IF |
| SIGIRR                          | Abcam                                            | ab 25875                 | Polyclonal | WB,IHC |
| IL18R1                          | Abcam                                            | ab117432                 | Polyclonal | WB,IHC |
| HIF-1 $\alpha$                  | Abcam                                            | ab113642                 | Monoclonal | WB,IHC |
| Stat3                           | Cell Signaling Technology                        | D3Z2G                    | Monoclonal | WB     |
| Phospho-Stat3<br>(Tyr705)       | Cell Signaling Technology                        | D3A7                     | Monoclonal | WB     |
| Phospho-Stat3<br>(Ser727)       | Cell Signaling Technology                        | D8C2Z                    | Monoclonal | WB     |
| $\beta$ -actin                  | Cell Signaling Technology                        | 8H10D10                  | Monoclonal | WB     |
| DAPI                            | Beyotime Biotechnology                           | C1002                    |            | IF     |
| <b>siRNAs</b>                   |                                                  | <b>sequences (5'-3')</b> |            |        |
| IL37 #1                         | UCCUGGAACAUGCUGGAGUTT/ ACUCCAGCAUGUCCAGGATT      |                          |            |        |
| IL37 #2                         | UGGGGUGAVAGAUAAAUUUTT/ AAUUUAUCUGUCACCCCATT      |                          |            |        |
| SIGIRR #1                       | GCAGCUCAGUGGCUCUGAATT/ UUCAGAGCCACUGAGCUGCTT     |                          |            |        |
| SIGIRR #2                       | GCCGCCUGCUCUAUGUCATT/ UGACAUAGAGCAGGGCGGCTT      |                          |            |        |
| IL18R1 #1                       | CCAGGCCACGUCUUCACAATT/ UUGUGAAGACGUGGCCUGGTT     |                          |            |        |
| IL18R1 #2                       | CCUGUUCUUUCCGAGUCUUTT/ AAGACUCGGAAAGAACAGGTT     |                          |            |        |
| HIF-1 $\alpha$ #1               | GCCGAGGAAGAACUAUGAATT/ UUCAUAGUUCUCCUCGGCTT      |                          |            |        |
| HIF-1 $\alpha$ #2               | GCCGCUCAUUUAUGAAUATT/ UAUUCAUAAAUUGAGCGGCTT      |                          |            |        |
| Positive control                | UGACCUCAACUACAUGGUUTT/AACCAUGUAGUUGAGGUCATT      |                          |            |        |
| Negative control                | UUCUCCGAACGUGUCACGUTT/ACGUGACACGUUCGGAGAATT      |                          |            |        |
| <b>Primer sequences (5'-3')</b> |                                                  |                          |            |        |
| IL37                            | F:CCTGGACTCTGGGAATCTCA R: AGAGGCTGAGCTCAAGGATG   |                          |            |        |
| HIF-1 $\alpha$                  | F:GGTGCTGATTTGTGAACCCA R: TATCCAGGCTGTGTCTGACTG  |                          |            |        |
| GAPDH                           | F:GGAGCGAGATCCCTCCAAAATR:GGCTGTTGTCATACTTCTCATGG |                          |            |        |

---

|              |                         |                         |
|--------------|-------------------------|-------------------------|
| IL-37-1-P*   | F: TGTTGAAAGCTCTCGGTCAA | R: TGCTCTGCAACCTCTTTTCA |
| IL-37-2-P*   | F: TTCAGGGATACTGCCAAACC | R: AGGGCTTCAGGACTCAACAA |
| IL-37-3/4-P* | F: CCACGTGAAGCACATCTGAA | R: CCAGCAATGCCCTACTTGTT |

---

WB: Western blotting; IHC: Immunohistochemistry; IF: Immunofluorescence; siRNA: Small interfering RNA; P\*: Promoter
